# Supplementary material for: The transcriptome of human mammary epithelial cells infected with the HCMV-DB strain displays oncogenic traits
Source: PubMed Central journal article supplement (PMC6105607; doi:10.1038/s41598-018-30109-1), 2018-08-22
Supplement: 41598_2018_30109_MOESM1_ESM.pdf [file 41598_2018_30109_MOESM1_ESM.pdf]

## The transcriptome of human mammary epithelial cells infected with the HCMV-DB strain displays oncogenic traits.

Fatima Al Moussawi<sup>1,2,+</sup>, Amit Kumar<sup>1,+</sup>, Sébastien Pasquereau<sup>1</sup>, Manoj K. Tripathy<sup>1</sup>, Walid Karam<sup>2</sup>, Mona Diab-Assaf<sup>2</sup> & Georges Herbein<sup>1,3,\*</sup>.

**Suppl. Fig. 1** Upregulation of the tumor suppressor gene hypermethylated in cancer 1 (HIC1) and forkhead box D3 (FOXD3) in HMECs infected with HCMV-DB.

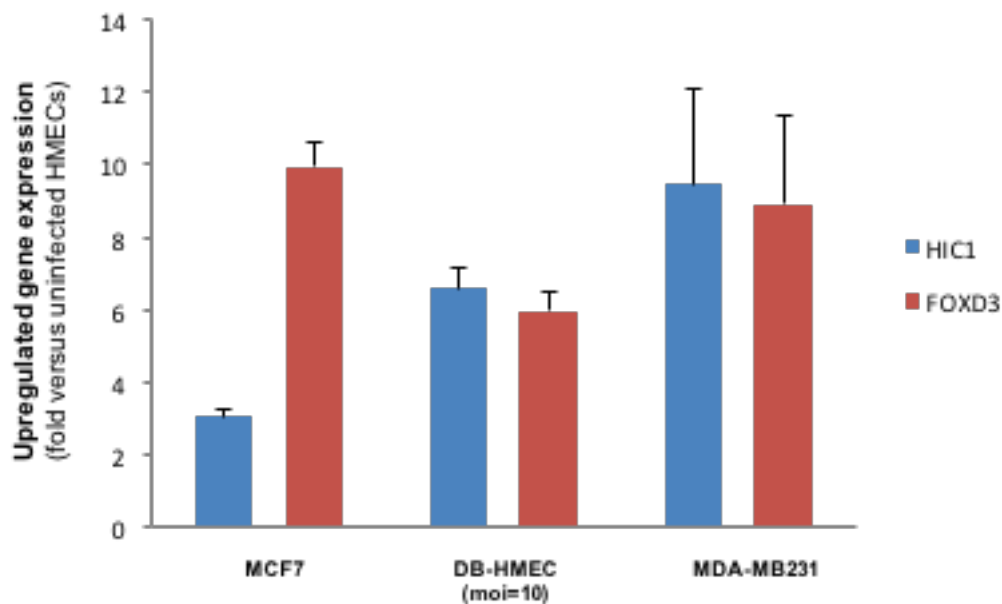

**Suppl. Table 1.** Degree of variability between the ORF of the 11 HCMV strains studied.

| Conserved genes | Variable genes | Highly Variable |
|-----------------|----------------|-----------------|
| IRS1            | RL10           | RL1             |
| RL11            | RL8A           | RL12            |
| RNA1.2          | S30            | RL13            |
| RNA2.7          | UL10           | RL5A            |
| RNA4.9          | UL11           | RL6             |
| RNA5.0          | UL112          | RL9             |
| TRS1            | UL115          | RL9A            |
| UL13            | UL121          | UL1             |
| UL100           | UL124          | UL105           |
| UL102           | UL130          | UL119           |
| UL103           | UL132          | UL120           |
| UL104           | UL135          | UL128           |
| UL111A          | UL138          | UL133           |
| UL114           | UL139          | UL139           |
| UL116           | UL14           | UL144           |
| UL117           | UL140          | UL146           |
| UL122           | UL142          | UL147           |
| UL123           | UL148          | UL147A          |
| UL131A          | UL148B         | UL148A          |
| UL136           | UL150A         | UL148D          |
| UL141           | UL17           | UL150           |
| UL145           | UL19           | UL2             |
| UL148C          | UL20           | UL33            |
| UL15A           | UL22A          | UL4             |
| UL16            | UL27           | UL40            |
| UL18            | UL30           | UL47            |
| UL21A           | UL40           | UL6             |
| UL23            | UL41A          | UL61            |
| UL24            | UL45           | UL73            |
| UL25            | UL49           | UL74A           |
| UL26            | UL55           | UL74A           |
| UL29            | UL7            | UL75            |
| UL31            | UL76           | UL9             |
| UL32            | UL78           | US1             |
| UL34            | UL8            | US10            |
| UL35            | UL80           | US27            |
| UL36            | UL87           | US33A           |
| UL37            | UL93           | US7             |
| UL38            | UL99           |                 |
| UL42            | US23           |                 |
| UL43            | US26           |                 |
| UL44            | US28           |                 |
| UL46            | US33A          |                 |
| UL47            | US6            |                 |
| UL48            | US9            |                 |
| UL48A           |                |                 |
| UL5             |                |                 |
| UL50            |                |                 |
| UL51            |                |                 |
| UL52            |                |                 |
| UL53            |                |                 |
| UL54            |                |                 |
| UL56            |                |                 |
| UL57            |                |                 |
| UL69            |                |                 |
| UL70            |                |                 |
| UL71            |                |                 |
| UL72            |                |                 |
| UL77            |                |                 |
| UL79            |                |                 |
| UL80.5          |                |                 |
| UL82            |                |                 |
| UL83            |                |                 |
| UL84            |                |                 |
| UL85            |                |                 |
| UL86            |                |                 |
| UL88            |                |                 |
| UL89            |                |                 |
| UL91            |                |                 |
| UL92            |                |                 |
| UL94            |                |                 |
| UL95            |                |                 |
| UL96            |                |                 |
| UL97            |                |                 |
| UL98            |                |                 |
| US11            |                |                 |
| US12            |                |                 |
| US13            |                |                 |
| US14            |                |                 |
| US15            |                |                 |
| US16            |                |                 |
| US17            |                |                 |
| US18            |                |                 |
| US19            |                |                 |
| US20            |                |                 |
| US21            |                |                 |
| US21            |                |                 |
| US22            |                |                 |
| US24            |                |                 |
| US29            |                |                 |
| US3             |                |                 |
| US31            |                |                 |
| US32            |                |                 |
| US34            |                |                 |
| US8             |                |                 |

**Suppl. Table 2.** Cellular gene expression in HMECs infected with HCMV-DB compared to uninfected HMECs using the human breast cancer genes RT<sup>2</sup> profiler PCR assays (PAHS-131ZA).

| Symbol   | Description                                          | Fold Up- or Down- Regulation/ HMEC UI |                 |                   |           |
|----------|------------------------------------------------------|---------------------------------------|-----------------|-------------------|-----------|
|          |                                                      | MCF-7                                 | HMEC DB<br>1MOI | HMEC DB<br>10 MOI | MDAMB-231 |
| CCNA1    | Cyclin A1                                            | -1.68                                 | 3.62            | 6.73              | 7.03      |
| CCNA2    | Cyclin A2                                            | 5.44                                  | 3.83            | 10.49             | 16.27     |
| CCNE1    | Cyclin E1                                            | -2.11                                 | 4.05            | 8.52              | 3.08      |
| CDH1     | Cadherin 1. type 1. E-cadherin (epithelial)          | ND                                    | 6.33            | 7.54              | ND        |
| CLDN7    | Claudin 7                                            | ND                                    | 9.43            | 26.93             | ND        |
| CTNNB1   | Catenin (cadherin-associated protein). beta 1. 88kDa | ND                                    | 2.94            | 6.97              | ND        |
| EGF      | Epidermal growth factor                              | ND                                    | 1.28            | 6.08              | ND        |
| ESR1     | Estrogen receptor 1                                  | 875.39                                | 2.34            | 24.26             | 5.40      |
| ESR2     | Estrogen receptor 2 (ER beta)                        | 16.15                                 | -2.46           | 47.54             | 41.18     |
| GATA3    | GATA binding protein 3                               | 154.75                                | 4.62            | 5.21              | 1.72      |
| GLI1     | Glioma-associated oncogene                           | ND                                    | -3,71           | ND                | ND        |
| HER2     | Human epidermal growth factor receptor 2             | 5.45                                  | 4.30            | 32.84             | 10.06     |
| IGF1R    | Insulin Like Growth Factor 1 Receptor                | ND                                    | -7,32           | ND                | ND        |
| ITGA6    | Integrin Subunit Alpha 6                             | ND                                    | 2.63            | 11.48             | ND        |
| KRT18    | Keratin 18                                           | 59.46                                 | 0.01            | 5.86              | 5.75      |
| KRT19    | Keratin 19                                           | 34249.59                              | 2.21            | 8.88              | 4717.98   |
| MAPK3    | Mitogen-Activated Protein Kinase 3                   | ND                                    | -10,36          | ND                | ND        |
| MAPK8    | Mitogen-Activated Protein Kinase 8                   | ND                                    | -5,59           | ND                | ND        |
| MKI67    | Antigen identified by monoclonal antibody Ki-67      | 15.93                                 | 4.10            | 10.86             | 14.46     |
| PGR      | Progesterone receptor                                | 1482.48                               | 0.09            | 57.32             | 8.02      |
| SERPINE1 | Serpin Family E Member 1                             | ND                                    | 2.41            | 26.37             | ND        |
| S100A4   | S100 Calcium Binding Protein A4                      | ND                                    | 2.52            | 1.41              | ND        |
| TFF1     | Trefoil factor 1                                     | 8294934.92                            | 3.67            | 150.22            | 2126.04   |
| THBS1    | Thrombospondin 1                                     | ND                                    | 3.15            | 7.07              | ND        |
| TOPO2A   | Topoisomerase (DNA) II alpha 170kDa                  | 16.04                                 | 6.09            | 36.02             | 22.85     |

**Suppl. Table 3.** Cellular gene expression in HMECs infected with HCMV-DB compared to uninfected HMECs using the oncogenes/tumor suppressor genes RT<sup>2</sup> profiler PCR assays (PAHS-502Z).

| Symbol | Description                                                            | Fold Up- or Down- Regulation/ HMEC UI |              |                |           |
|--------|------------------------------------------------------------------------|---------------------------------------|--------------|----------------|-----------|
|        |                                                                        | MCF-7                                 | HMEC DB 1MOI | HMEC DB 10 MOI | MDAMB-231 |
| ABL1   | C-abl oncogene 1. receptor tyrosine kinase                             | 4.17                                  | 4.73         | 4.24           | 2.07      |
| AKT1   | V-akt murine thymoma viral oncogene homolog 1                          | 12.13                                 | 4.00         | 1.43           | 2.05      |
| ATM    | Ataxia telangiectasia mutated                                          | 2.59                                  | 4.03         | 5.37           | 5.19      |
| BCL-2  | B-cell CLL/lymphoma 2                                                  | 6.04                                  | 2.51         | 8.52           | 65.52     |
| CASP8  | Caspase 8. apoptosis-related cysteine peptidase                        | 4.29                                  | -3.36        | 4.87           | 1.42      |
| CCND1  | Cyclin D1                                                              | 4.12                                  | 5.76         | 9.01           | 15.18     |
| CDK4   | Cyclin-dependent kinase-4                                              | 21.87                                 | 3.73         | 2.98           | 3.04      |
| CDKN1A | Cyclin-dependent kinase inhibitor 1A (p21. Cip1)                       | 3.33                                  | 3.12         | 4.39           | -6.53     |
| CDKN2A | Cyclin-dependent kinase inhibitor 2A (melanoma. p16. inhibits CDK4)    | -513.42                               | 5.79         | 4.55           | -641.81   |
| CDKN2B | Cyclin-dependent kinase inhibitor 2B (p15. inhibits CDK4)              | 4.15                                  | 3.21         | 5.37           | -1046.53  |
| CDKN3  | Cyclin-dependent kinase inhibitor 3                                    | 24.35                                 | 7.58         | 4.04           | 2.78      |
| CST6   | Cystatin-M                                                             | ND                                    | -3.61        | ND             | ND        |
| CTSD   | Cathepsin D                                                            | ND                                    | -1.85        | ND             | ND        |
| ETS1   | V-ets erythroblastosis virus E26 oncogene homolog 1 (avian)            | -730.50                               | 8.95         | 5.96           | 3.37      |
| FHIT   | Fragile histidine triad gene                                           | 1.68                                  | 2.25         | 3.96           | 0.16      |
| FOS    | V-fos FBJ murine osteosarcoma viral oncogene homolog                   | -1.56                                 | 14.04        | 4.94           | -4.96     |
| FOXD3  | Forkhead box D3                                                        | 9.92                                  | ND           | 5.96           | 8.91      |
| HIC1   | Hypermethylated in cancer 1                                            | 3.08                                  | ND           | 6.61           | 9.48      |
| HRAS   | V-Ha-ras Harvey rat sarcoma viral oncogene homolog                     | 2.35                                  | 4.23         | 2.74           | -2.08     |
| ID1    | Inhibitor of DNA binding 1, dominant negative helix-loop-helix protein | 191.84                                | -5.24        | 3.76           | 2.30      |

|               |                                                                               | <b>Fold Up- or Down- Regulation/ HMEC UI</b> |                         |                           |                  |
|---------------|-------------------------------------------------------------------------------|----------------------------------------------|-------------------------|---------------------------|------------------|
| <b>Symbol</b> | <b>Description</b>                                                            | <b>MCF-7</b>                                 | <b>HMEC DB<br/>1MOI</b> | <b>HMEC DB<br/>10 MOI</b> | <b>MDAMB-231</b> |
| IL6           | Interleukin 6<br>(interferon. beta 2)                                         | -4.43                                        | -3.89                   | 16.92                     | 331.75           |
| IL6R          | Interleukin 6 receptor                                                        | 2.93                                         | 3.65                    | 9.19                      | -6.31            |
| IL6ST         | Interleukin 6 signal<br>transducer (gp130.<br>oncostatin M receptor)          | 5.40                                         | 4.91                    | 22.80                     | 32.99            |
| JAK2          | Janus kinase 2                                                                | 14.04                                        | 4.53                    | 7.34                      | 2.82             |
| JUN           | Jun oncogene                                                                  | 6.50                                         | 5.10                    | 1.99                      | 3.80             |
| KITLG         | KIT ligand                                                                    | 3.27                                         | 9.13                    | 2.98                      | 2.40             |
| KRAS          | V-Ki-ras2 Kirsten rat<br>sarcoma viral<br>oncogene homolog                    | 5.39                                         | 8.12                    | 2.17                      | 1.68             |
| MCL1          | Myeloid cell leukemia<br>sequence 1 (BCL2-<br>related)                        | 5.43                                         | 4.50                    | 2.86                      | -1458.21         |
| MET           | Met proto-oncogene<br>(hepatocyte growth<br>factor receptor)                  | -6.60                                        | 5.74                    | 3.06                      | 1.48             |
| MLH1          | MutL homolog 1.<br>colon cancer.<br>nonpolyposis type 2<br>(E. coli)          | 9.01                                         | 3.98                    | 3.72                      | 3.10             |
| MMP9          | Matrix<br>metallopeptidase 9                                                  | ND                                           | 7,91                    | ND                        | ND               |
| MOS           | V-mos Moloney<br>murine sarcoma viral<br>oncogene homolog                     | ND                                           | -2.60                   | ND                        | ND               |
| MYB           | V-myb myeloblastosis<br>viral oncogene<br>homolog (avian)                     | 1060.90                                      | 2.19                    | 2.78                      | 13.31            |
| MYC           | V-myc<br>myelocytomatosis viral<br>oncogene homolog<br>(avian)                | 1.59                                         | 9.86                    | 3.72                      | 1.45             |
| NFKB1         | Nuclear factor of<br>kappa light<br>polypeptide gene<br>enhancer in B-cells 1 | 4.47                                         | 3.63                    | 1.52                      | 0.01             |
| NFKBIA        | Nuclear factor of<br>kappa light<br>polypeptide gene<br>enhancer in B-cells 1 | 6.11                                         | 2.81                    | 1.53                      | 1.28             |
| NRAS          | Neuroblastoma RAS<br>viral (v-ras) oncogene<br>homolog                        | 35.53                                        | 8.52                    | 1.96                      | 3.67             |
| PIK3C2A       | Phosphoinositide-3-<br>kinase, class 2, alpha<br>polypeptide                  | 5.32                                         | 7.07                    | 2.32                      | 1.88             |

|               |                                                                                  | <b>Fold Up- or Down- Regulation/ HMEC UI</b> |                          |                            |                  |
|---------------|----------------------------------------------------------------------------------|----------------------------------------------|--------------------------|----------------------------|------------------|
| <b>Symbol</b> | <b>Description</b>                                                               | <b>MCF-7</b>                                 | <b>HuMEC DB<br/>1MOI</b> | <b>HuMEC DB<br/>10 MOI</b> | <b>MDAMB-231</b> |
| PIK3CA        | Phosphoinositide-3-kinase, catalytic, alpha polypeptide                          | 5.28                                         | 5.82                     | 2.84                       | 6.30             |
| PML           | Promyelocytic leukemia                                                           | 2.45                                         | 10.13                    | 1.78                       | 2.84             |
| PRKCA         | Protein kinase C. alpha                                                          | 8.52                                         | 6.24                     | 2.29                       | 35.88            |
| RAF1          | V-raf-1 murine leukemia viral oncogene homolog 1                                 | 13.56                                        | 5.32                     | 2.34                       | 2.29             |
| RARA          | Retinoic acid receptor. alpha                                                    | 4.96                                         | 7.32                     | -1.20                      | 8.72             |
| RB1           | Retinoblastoma 1                                                                 | 3.72                                         | 4.16                     | 1.52                       | 6.75             |
| REL           | V-rel reticuloendotheliosis viral oncogene homolog (avian)                       | 3.97                                         | 3.76                     | -1.14                      | 0.23             |
| RET           | Ret proto-oncogene                                                               | 515.94                                       | 6.59                     | 3.59                       | 1.81             |
| ROS1          | C-ros oncogene 1 . receptor tyrosine kinase                                      | -4.67                                        | 6.07                     | 4.01                       | -5.73            |
| RUNX1         | Runt-related transcription factor 1                                              | 3.37                                         | 3.92                     | 1.37                       | 2.94             |
| RUNX3         | Runt-related transcription factor 3                                              | -1.23                                        | 2.83                     | 5.96                       | 2.82             |
| SLIT2         | Slit homolog 2 (Drosophila)                                                      | -71.36                                       | -16.68                   | -90.57                     | -1304.20         |
| SMAD4         | SMAD family member 4                                                             | 2.14                                         | 3.39                     | 1.10                       | 4.10             |
| STAT3         | Signal transducer and activator of transcription 3 (acute-phase response factor) | -1.30                                        | 1.27                     | 1.50                       | -0.03            |
| STK11         | Serine/threonine kinase 11                                                       | 2.45                                         | 0.79                     | 0.65                       | -1.61            |
| TGFB1         | Transforming growth factor. beta 1                                               | -2.55                                        | 2.55                     | -1.23                      | 1.95             |
| TP53          | Tumor protein p53                                                                | 4.00                                         | 5.28                     | -1.20                      | 7.49             |
| TP73          | Tumor protein p73                                                                | 14.63                                        | 1.87                     | 3.42                       | 33.71            |
| TSC1          | Tuberous sclerosis 1                                                             | 4.00                                         | 2.10                     | 1.16                       | 3.00             |
| VHL           | Von Hippel-Lindau tumor suppressor                                               | 9.52                                         | 3.58                     | 1.07                       | 3.30             |

**Suppl. Table 4.** Cellular gene expression in HMECs infected with HCMV-DB compared to uninfected HMECs using the Human Epigenetic Chromatin Modification Enzymes RT<sup>2</sup> Profiler PCR Array (PAHS-085A).

| <b>Symbol</b> | <b>Description</b>                                       | <b>Fold Up- or Down- Regulation<br/>HMEC DB / HMEC UI</b> |
|---------------|----------------------------------------------------------|-----------------------------------------------------------|
| ASH1L         | ASH1 Like Histone Lysine Methyltransferas                | -155.00                                                   |
| ATF2          | Activating Transcription Factor 2                        | -9.10                                                     |
| AURKA         | Aurora Kinase A                                          | -8.20                                                     |
| AURKB         | Aurora Kinase B                                          | -3.96                                                     |
| AURKC         | Aurora Kinase C                                          | -2.15                                                     |
| CIITA         | Class II Major Histocompatibility Complex Transactivator | -3.91                                                     |
| CSRP2BP       | CSRP2 binding protein                                    | -6.26                                                     |
| DNMT3A        | DNA Methyltransferase 3 Alpha                            | -2.94                                                     |
| DNMT3B        | DNA Methyltransferase 3 Beta                             | -1.42                                                     |
| HDAC10        | Histone Deacetylase 10                                   | -2.05                                                     |
| HDAC2         | Histone Deacetylase 2                                    | -19.11                                                    |
| HDAC3         | Histone Deacetylase 3                                    | 7.43                                                      |
| HDAC4         | Histone Deacetylase 4                                    | -19.64                                                    |
| HDAC5         | Histone Deacetylase 5                                    | -3.57                                                     |
| HDAC6         | Histone Deacetylase 6                                    | -2.47                                                     |
| HDAC9         | Histone Deacetylase 9                                    | -2.03                                                     |
| KAT2A         | Lysine acetyltransferase 2A                              | -12.26                                                    |
| KAT6B         | Lysine acetyltransferase 6B                              | -17.34                                                    |
| KDM1A         | Lysine demethylase 1A                                    | -16.75                                                    |
| KDM5C         | Lysine demethylase 5C                                    | -3.40                                                     |
| KDM4C         | Lysine demethylase 4C                                    | -15.23                                                    |
| KDM6B         | Lysine demethylase 6B                                    | -12.43                                                    |
| MLL3 (KMT2C)  | Lysine methyltransferase 2C                              | -3.54                                                     |
| MLL5 (KMT2E)  | Lysine methyltransferase 2E                              | -4.98                                                     |
| MYSM1         | myb-like. SWIRM and MPN domains 1                        | -2.69                                                     |
| NCOA1         | Nuclear receptor coactivator 1                           | -3.52                                                     |
| NEK6          | NIMA related kinase 6                                    | -11.76                                                    |
| NSD1          | Nuclear receptor binding SET domain protein 1            | -2.82                                                     |

| <b>Symbol</b> | <b>Description</b>                       | <b>Fold Up- or Down- Regulation<br/>HMEC DB / HMEC UI</b> |
|---------------|------------------------------------------|-----------------------------------------------------------|
|               | WHSC1                                    | Wolf-Hirschhorn syndrome candidate 1                      |
| PRMT1         | Protein arginine methyltransferase 1     | -2.63                                                     |
| PRMT2         | Protein arginine methyltransferase 2     | -2.63                                                     |
| PRMT3         | Protein arginine methyltransferase 3     | 2.68                                                      |
| PRMT5         | Protein arginine methyltransferase 5     | 2.76                                                      |
| PRMT6         | Protein arginine methyltransferase 6     | 2.84                                                      |
| PRMT8         | Protein arginine methyltransferase 8     | -22.41                                                    |
| RNF2          | Ring finger protein 2                    | -551.09                                                   |
| RNF20         | Ring finger protein 20                   | -84.81                                                    |
| RPS6KA3       | Ribosomal protein S6 kinase A3           | -554.92                                                   |
| SETD1A        | SET domain containing 1A                 | -7.39                                                     |
| SETDB1        | SET domain bifurcated 1                  | -18.58                                                    |
| SETDB2        | SET domain bifurcated 2                  | -76.96                                                    |
| SETD2         | SET domain containing 2                  | -3.85                                                     |
| SETD3         | SET domain containing 3                  | -3.54                                                     |
| SETD4         | SET domain containing 4                  | 2.22                                                      |
| SETD5         | SET domain containing 5                  | -8.73                                                     |
| SETD6         | SET domain containing 6                  | -7.98                                                     |
| SETD7         | SET domain containing 7                  | -51.84                                                    |
| SETD8         | SET domain containing 8                  | -4056.84                                                  |
| SMYD3         | SET and MYND domain containing 3         | -2.45                                                     |
| SUV39H1       | Suppressor of variegation 3-9 homolog 1  | -5.72                                                     |
| SUV420H1      | Suppressor of variegation 4-20 homolog 1 | -26.10                                                    |
| UBE2A         | Ubiquitin conjugating enzyme E2 A        | -11.92                                                    |
| UBE2B         | Ubiquitin conjugating enzyme E2 B        | -3.99                                                     |
| USP21         | Ubiquitin specific peptidase 21          | -94.10                                                    |
| USP22         | Ubiquitin specific peptidase 22          | -31.69                                                    |
| WHSC1         | Wolf-Hirschhorn syndrome candidate 1     | -32.13                                                    |



**Suppl. Table 5.** Cellular gene families classification of the Human Epigenetic Chromatin Modification Enzymes RT<sup>2</sup> Profiler PCR Array (PAHS-085A).

| <b>Family</b>                            | <b>Symbol</b> | <b>Description</b>                                       |
|------------------------------------------|---------------|----------------------------------------------------------|
| Histone acetyltransferase genes          | ATF2          | Activating Transcription Factor 2                        |
|                                          | CIITA         | Class II Major Histocompatibility Complex Transactivator |
|                                          | CSRP2BP       | CSRP2 binding protein                                    |
|                                          | KAT2A         | Lysine acetyltransferase 2A                              |
|                                          | KAT6B         | Lysine acetyltransferase 6B                              |
|                                          | NCOA1         | Nuclear receptor coactivator 1                           |
| Histone kinase genes                     | AURKA         | Aurora Kinase A                                          |
|                                          | AURKB         | Aurora Kinase B                                          |
|                                          | AURKC         | Aurora Kinase C                                          |
|                                          | NEK6          | NIMA related kinase 6                                    |
|                                          | RPS6KA3       | Ribosomal protein S6 kinase A3                           |
| Genes involved in histone ubiquitination | MYSM1         | Myb Like SWIRM and MPN domains 1                         |
|                                          | RNF2          | Ring finger protein 2                                    |
|                                          | RNF20         | Ring finger protein 20                                   |
|                                          | UBE2A         | Ubiquitin conjugating enzyme E2 A                        |
|                                          | UBE2B         | Ubiquitin conjugating enzyme E2 B                        |
|                                          | USP21         | Ubiquitin specific peptidase 21                          |
|                                          | USP22         | Ubiquitin specific peptidase 22                          |
| DNA/histone demethylase genes            | KDM1A         | Lysine demethylase 1A                                    |
|                                          | KDM5C         | Lysine demethylase 5C                                    |
|                                          | KDM4C         | Lysine demethylase 4C                                    |
|                                          | KDM6B         | Lysine demethylase 6B                                    |

| <b>Family</b>             | <b>Symbol</b> | <b>Description</b>     |
|---------------------------|---------------|------------------------|
| Histone deacetylase genes | HDAC10        | Histone Deacetylase 10 |
|                           | HDAC2         | Histone Deacetylase 2  |
|                           | HDAC3         | Histone Deacetylase 3  |
|                           | HDAC4         | Histone Deacetylase 4  |
|                           | HDAC5         | Histone Deacetylase 5  |
|                           | HDAC6         | Histone Deacetylase 6  |
|                           | HDAC9         | Histone Deacetylase 9  |
